# Supplementary material
Source: ML conference proceedings conference paper supplement (https://openreview.net/forum?id=sD93GOzH3i5)
Supplement: supplementary_material [file attachment]

# Measuring Coding Challenge Competence With APPS — Supplementary Material

**Dan Hendrycks\*** UC Berkeley   **Steven Basart\*** UChicago   **Saurav Kadavath** UC Berkeley   **Mantas Mazeika** UIUC   **Akul Arora** UC Berkeley

**Ethan Guo**  
UC Berkeley

**Collin Burns**  
UC Berkeley

**Samir Puranik**  
UC Berkeley

**Horace He**  
Cornell

**Dawn Song**  
UC Berkeley

**Jacob Steinhardt**  
UC Berkeley

|                          | Hearthstone | Django  | NAPS       | APPS                 |
|--------------------------|-------------|---------|------------|----------------------|
| Programming Language     | Python      | Python  | UAST       | Python               |
| Test Cases               | ✗           | ✗       | ✓          | ✓                    |
| Number of Programs       | 665         | 18,805  | 17,477     | 232,421              |
| Lines per Program (Avg.) | 7.7         | 1       | 21.7       | 18.0                 |
| Number of Exercises      | 665         | 18,805  | 2,231      | 10,000               |
| Text Input               | Card Text   | Comment | Pseudocode | Problem Descriptions |

Table 1: Further comparisons of APPS with previous datasets.

| Model        | Top-5 Test Case Average |           |             |         | Top-5 Strict Accuracy |           |             |         |
|--------------|-------------------------|-----------|-------------|---------|-----------------------|-----------|-------------|---------|
|              | Introductory            | Interview | Competitive | Average | Introductory          | Interview | Competition | Average |
| GPT-2 0.1B   | 13.81                   | 10.97     | 7.03        | 10.75   | 2.70                  | 0.73      | 0.00        | 1.02    |
| GPT-2 1.5B   | 16.86                   | 13.84     | 9.01        | 13.48   | 3.60                  | 1.03      | 0.00        | 1.34    |
| GPT-Neo 2.7B | 19.89                   | 13.19     | 9.90        | 13.87   | 5.50                  | 0.80      | 0.00        | 1.58    |

Table 2: Top-5 performance of GPT-2 models and GPT-Neo. Taking the best of five candidate solutions markedly improves performance.

## A Checklist Information

**Legal Compliance.** In APPS, we scrape question text, ground-truth solutions, and test cases from various coding challenge websites. These websites are AtCoder, CodeChef, Codeforces, Codewars, HackerRank, Kattis, and LeetCode. In all cases, we only scrape public-facing data. For instance, we avoid scraping data from paywalled portions of sites. In the case of Kattis, all problems we scrape are under the CC BY-SA 3.0 license (<https://creativecommons.org/licenses/by-sa/3.0/>). For other websites, some content may be copyrighted. In these cases, we abide by Fair Use §107: “the fair use of a copyrighted work, including such use by ... scholarship, or research, is not an infringement of copyright”, where fair use is determined by “the purpose and character of the use, including whether such use is of a commercial nature or is for nonprofit educational purposes”, “the amount and substantiality of the portion used in relation to the copyrighted work as a whole”, and “the effect of the use upon the potential market for or value of the copyrighted work.” The APPS dataset is

\*Equal Contribution.

13 noncommercial and is likely to have no effect on the value of the original problems. Moreover, for all  
14 problem sources, we only scrape a fraction of the available problems and ground-truth solutions.

15 Regarding international copyright laws, the websites that we scrape from are based in the United  
16 States, Japan, India, and Russia, all of which are contracting parties to the WIPO Copyright Treaty.  
17 In the United States, the WIPO Copyright Treaty is implemented by the Digital Millenium Copyright  
18 Act (DMCA). Since APPS was made in the United States, the DMCA is the relevant legislation that  
19 we must comply with. Notably, DMCA §1201 states, “No person shall circumvent a technological  
20 measure that effectively controls access to a work protected under this title.” We do not circumvent  
21 access controls when creating APPS and hence abide by §1201. Fair Use extends to content protected  
22 by the DMCA, for which we refer readers to the previous paragraph.

23 Although GDPR only applies in the European Union, some of the ground-truth solutions in APPS  
24 may have been written by EU citizens. GDPR is chiefly concerned with the protection of personal  
25 data gathered by entities engaging in economic activity. The only personally linked information in  
26 APPS is the problem solutions written by individuals and published under aliases to public websites.  
27 In some cases, these solutions contain identifying information in comments, which we remove to  
28 preserve privacy. We comply with GDPR, because our processed solutions remove identifiers, and  
29 we are compliant because we collect the data for academic research purposes.

30 **Author Statement and License.** We bear all responsibility in case of violation of rights. The  
31 APPS data is licensed under CC BY-SA 3.0 in accordance with the Kattis problem licenses and the  
32 ShareAlike terms. Our code is open sourced under the MIT license.

## 33 **B Datasheets**

34 We follow the recommendations of Gebru et al. (2018) and provide a datasheet for the ETHICS  
35 dataset in this section.

### 36 **B.1 Motivation**

37 **For what purpose was the dataset created? Was there a specific task in mind? Was there**  
38 **a specific gap that needed to be filled? Please provide a description.** The APPS dataset was  
39 created to track the progress of code generation models on the task of generating arbitrary Python code  
40 from complex natural language specifications, a challenging setting that had no rigorous benchmark  
41 before our work.

42 **Who created the dataset (e.g., which team, research group) and on behalf of which entity (e.g.,**  
43 **company, institution, organization)?** Refer to the main document.

44 **Who funded the creation of the dataset? If there is an associated grant, please provide the**  
45 **name of the grantor and the grant name and number.** There is no associated grant.

46 **Any other comments?** No.

### 47 **B.2 Composition**

48 **What do the instances that comprise the dataset represent (e.g., documents, photos, people,**  
49 **countries)? Are there multiple types of instances (e.g., movies, users, and ratings; people and**  
50 **interactions between them; nodes and edges)? Please provide a description.** The instances  
51 are coding challenge problems posed in natural language, each of which consists of question text,  
52 ground-truth solutions, and test cases. Please refer to the main document for more detail.

53 **How many instances are there in total (of each type, if appropriate)?** APPS contains 10,000  
54 problems, 232,421 ground-truth solutions, and 131,777 test cases.

55 **Does the dataset contain all possible instances or is it a sample (not necessarily random) of**  
56 **instances from a larger set? If the dataset is a sample, then what is the larger set? Is the**  
57 **sample representative of the larger set (e.g., geographic coverage)? If so, please describe how**

58 **this representativeness was validated/verified. If it is not representative of the larger set, please**  
59 **describe why not (e.g., to cover a more diverse range of instances, because instances were**  
60 **withheld or unavailable).** APPS contains a subset of all possible test cases for its problems. These  
61 test cases are written by problem designers to cover important functionality.

62 **What data does each instance consist of? “Raw” data (e.g., unprocessed text or images) or fea-**  
63 **tures? In either case, please provide a description.** Each instance consists of text and numerical  
64 data.

65 **Is there a label or target associated with each instance? If so, please provide a description.**  
66 Each instance is associated with test cases, which provide a ground-truth signal for functional  
67 correctness.

68 **Is any information missing from individual instances? If so, please provide a description,**  
69 **explaining why this information is missing (e.g., because it was unavailable). This does not**  
70 **include intentionally removed information, but might include, e.g., redacted text.** No.

71 **Are relationships between individual instances made explicit (e.g., users’ movie ratings, social**  
72 **network links)? If so, please describe how these relationships are made explicit.** We remove  
73 duplicate or near-duplicate problems from APPS.

74 **Are there recommended data splits (e.g., training, development/validation, testing)? If so,**  
75 **please provide a description of these splits, explaining the rationale behind them.** We pro-  
76 vide a training and test split. The splits were optimized for increasing the number of test cases in the  
77 test split while maintaining a fixed number of problems from each difficulty.

78 **Are there any errors, sources of noise, or redundancies in the dataset? If so, please provide a**  
79 **description.** See Section 3 in the main paper for a discussion of test case quality.

80 **Is the dataset self-contained, or does it link to or otherwise rely on external resources (e.g.,**  
81 **websites, tweets, other datasets)?** The dataset is self-contained.

82 **Does the dataset contain data that might be considered confidential (e.g., data that is protected**  
83 **by legal privilege or by doctor-patient confidentiality, data that includes the content of individ-**  
84 **uals’ non-public communications)? If so, please provide a description.** No.

85 **Does the dataset contain data that, if viewed directly, might be offensive, insulting, threatening,**  
86 **or might otherwise cause anxiety? If so, please describe why.** Unknown.

87 **Does the dataset relate to people? If not, you may skip the remaining questions in this section.**  
88 Yes.

89 **Does the dataset identify any subpopulations (e.g., by age, gender)? If so, please describe how**  
90 **these subpopulations are identified and provide a description of their respective distributions**  
91 **within the dataset.** No.

92 **Is it possible to identify individuals (i.e., one or more natural persons), either directly or in-**  
93 **directly (i.e., in combination with other data) from the dataset? If so, please describe how**  
94 **No.**

95 **Does the dataset contain data that might be considered sensitive in any way (e.g., data that re-**  
96 **veals racial or ethnic origins, sexual orientations, religious beliefs, political opinions or union**  
97 **memberships, or locations; financial or health data; biometric or genetic data; forms of govern-**  
98 **ment identification, such as social security numbers; criminal history)? If so, please provide a**  
99 **description.** No.

100 **Any other comments?** No.

101 **B.3 Collection Process**

102 **How was the data associated with each instance acquired? Was the data directly observable**  
103 **(e.g., raw text, movie ratings), reported by subjects (e.g., survey responses), or indirectly in-**  
104 **ferred/derived from other data (e.g., part-of-speech tags, model-based guesses for age or lan-**  
105 **guage)? If data was reported by subjects or indirectly inferred/derived from other data, was**  
106 **the data validated/verified? If so, please describe how.** All data was collected by scraping  
107 problems from coding challenge websites, such as Codewars, AtCoder and Kattis.

108 **What mechanisms or procedures were used to collect the data (e.g., hardware apparatus or**  
109 **sensor, manual human curation, software program, software API)? How were these mecha-**  
110 **nisms or procedures validated?** We used off-the-shelf and custom-built scrapers. We manually  
111 checked whether scraped data matched text on the websites.

112 **If the dataset is a sample from a larger set, what was the sampling strategy (e.g., deterministic,**  
113 **probabilistic with specific sampling probabilities)?** Some problems we scraped were left out of  
114 APPS for various reasons, e.g. they required images to solve, they lacked ground-truth solutions and  
115 test cases, or they were duplicate problems.

116 **Who was involved in the data collection process (e.g., students, crowdworkers, contractors)**  
117 **and how were they compensated (e.g., how much were crowdworkers paid)?** All data was  
118 collected by undergraduate and graduate student authors on the paper.

119 **Over what timeframe was the data collected? Does this timeframe match the creation time-**  
120 **frame of the data associated with the instances (e.g., recent crawl of old news articles)? If**  
121 **not, please describe the timeframe in which the data associated with the instances was created.**  
122 Data was collected from late 2020 to early 2021 and refined for six months.

123 **Were any ethical review processes conducted (e.g., by an institutional review board)? If so,**  
124 **please provide a description of these review processes, including the outcomes, as well as a link**  
125 **or other access point to any supporting documentation** No.

126 **Does the dataset relate to people? If not, you may skip the remainder of the questions in this**  
127 **section.** Yes.

128 **Did you collect the data from the individuals in question directly, or obtain it via third parties**  
129 **or other sources (e.g., websites)?** We scraped data via websites where individuals had publicly  
130 posted problem solutions.

131 **Were the individuals in question notified about the data collection? If so, please describe**  
132 **(or show with screenshots or other information) how notice was provided, and provide a link**  
133 **or other access point to, or otherwise reproduce, the exact language of the notification itself.**  
134 Users who posted on the Internet were not notified of our collection, because their examples were  
135 posted publicly.

136 **Did the individuals in question consent to the collection and use of their data? If so, please**  
137 **describe (or show with screenshots or other information) how consent was requested and pro-**  
138 **vided, and provide a link or other access point to, or otherwise reproduce, the exact language**  
139 **to which the individuals consented.** N/A

140 **If consent was obtained, were the consenting individuals provided with a mechanism to revoke**  
141 **their consent in the future or for certain uses? If so, please provide a description, as well as a**  
142 **link or other access point to the mechanism (if appropriate).** N/A

143 **Has an analysis of the potential impact of the dataset and its use on data subjects (e.g., a data**  
144 **protection impact analysis) been conducted? If so, please provide a description of this analysis,**  
145 **including the outcomes, as well as a link or other access point to any supporting documentation.**  
146 No.

147 **Any other comments?** No.

#### 148 **B.4 Preprocessing/Cleaning/Labeling**

149 **Was any preprocessing/cleaning/labeling of the data done (e.g., discretization or bucketing,**  
150 **tokenization, part-of-speech tagging, SIFT feature extraction, removal of instances, processing**  
151 **of missing values)? If so, please provide a description. If not, you may skip the remainder of**  
152 **the questions in this section.** Yes, as described in Section 3 of the main paper.

153 **Was the “raw” data saved in addition to the preprocessed/cleaned/labeled data (e.g., to support**  
154 **unanticipated future uses)? If so, please provide a link or other access point to the “raw” data.**  
155 No.

156 **Is the software used to preprocess/clean/label the instances available? If so, please provide a**  
157 **link or other access point.** Not at this time.

158 **Any other comments?** No.

#### 159 **B.5 Uses**

160 **Has the dataset been used for any tasks already? If so, please provide a description.** Yes, see  
161 the main paper.

162 **Is there a repository that links to any or all papers or systems that use the dataset? If so, please**  
163 **provide a link or other access point.** No.

164 **What (other) tasks could the dataset be used for?** N/A

165 **Is there anything about the composition of the dataset or the way it was collected and prepro-**  
166 **cessed/cleaned/labeled that might impact future uses? For example, is there anything that a**  
167 **future user might need to know to avoid uses that could result in unfair treatment of individ-**  
168 **uals or groups (e.g., stereotyping, quality of service issues) or other undesirable harms (e.g.,**  
169 **financial harms, legal risks) If so, please provide a description. Is there anything a future user**  
170 **could do to mitigate these undesirable harms?** We describe how our data collection is legally  
171 compliant in Appendix A.

172 **Are there tasks for which the dataset should not be used? If so, please provide a description.**  
173 N/A

174 **Any other comments?** No.

#### 175 **B.6 Distribution**

176 **Will the dataset be distributed to third parties outside of the entity (e.g., company, institution,**  
177 **organization) on behalf of which the dataset was created? If so, please provide a description.**  
178 Yes, the dataset will be publicly distributed.

179 **How will the dataset will be distributed (e.g., tarball on website, API, GitHub)?**  
180 **Does the dataset have a digital object identifier (DOI)?** The dataset is available at  
181 <https://github.com/hendrycks/apps>.

182 **When will the dataset be distributed?** The dataset is currently available.

183 **Will the dataset be distributed under a copyright or other intellectual property (IP) license,**  
184 **and/or under applicable terms of use (ToU)? If so, please describe this license and/or ToU, and**  
185 **provide a link or other access point to, or otherwise reproduce, any relevant licensing terms**  
186 **or ToU, as well as any fees associated with these restrictions.** The code for our experimental  
187 framework is distributed under an MIT license. Where applicable,

188 **Have any third parties imposed IP-based or other restrictions on the data associated with the**  
189 **instances? If so, please describe these restrictions, and provide a link or other access point to,**  
190 **or otherwise reproduce, any relevant licensing terms, as well as any fees associated with these**  
191 **restrictions.** In cases where websites that we scrape data from have copyright policies, we abide  
192 by Fair Use according to §107, and we comply with GDPR even though all our problem sources with  
193 ground-truth solutions are based in the US. See Appendix A for details.

194 **Do any export controls or other regulatory restrictions apply to the dataset or to individual**  
195 **instances? If so, please describe these restrictions, and provide a link or other access point to,**  
196 **or otherwise reproduce, any supporting documentation.** No.

197 **Any other comments?** No.

## 198 **B.7 Maintenance**

199 **Who is supporting/hosting/maintaining the dataset?** Refer to the main document.

200 **How can the owner/curator/manager of the dataset be contacted (e.g., email address)?** Refer  
201 to the main document.

202 **Is there an erratum? If so, please provide a link or other access point.** Not at this time.

203 **Will the dataset be updated (e.g., to correct labeling errors, add new instances, delete in-**  
204 **stances)? If so, please describe how often, by whom, and how updates will be communicated**  
205 **to users (e.g., mailing list, GitHub)?** We plan to update the dataset with an additional JSON of  
206 test cases present in the question text for each problem. This will be available through GitHub.

207 **If the dataset relates to people, are there applicable limits on the retention of the data associ-**  
208 **ated with the instances (e.g., were individuals in question told that their data would be retained**  
209 **for a fixed period of time and then deleted)? If so, please describe these limits and explain how**  
210 **they will be enforced** No.

211 **Will older versions of the dataset continue to be supported/hosted/maintained? If so, please**  
212 **describe how. If not, please describe how its obsolescence will be communicated to users.** N/A

213 **If others want to extend/augment/build on/contribute to the dataset, is there a mechanism for**  
214 **them to do so? If so, please provide a description. Will these contributions be validated/ver-**  
215 **ified? If so, please describe how. If not, why not? Is there a process for communicating/dis-**  
216 **tributing these contributions to other users? If so, please provide a description.** Our dataset  
217 could be extended with additional problems that follow the formatting of existing problems.

218 **Any other comments?** No.

## 219 **C Additional Dataset Information**

220 **Expanded Dataset Comparisons.** We compared to several datasets in the (Kulal et al., 2019;  
221 Yu et al., 2018; Raychev et al., 2016; Iyer et al., 2018; Lu et al., 2021) main paper. We continue  
222 the comparisons below. Ling et al. (2016) introduce datasets based on Hearthstone and Magic the  
223 Gathering card games for code generation. Oda et al. (2015) provide a language-to-code dataset  
224 using simple code comments. Zavershynskyi et al. (2018) introduce the NAPS dataset for converting  
225 pseudocode to code, obtained by crowdsourcing low-level descriptions of programming exercises,  
226 and apply machine translation techniques to the problem. Recent anecdotal posts on social media have  
227 demonstrated that modern Transformers can in some instances generate JSX code adhering to user  
228 requests, but our work provides precision to the discussion through quantitative evaluation. Allamanis  
229 and Sutton (2013) introduce the GitHub Java Corpus used for performing language modeling on  
230 Java code. Liu et al. (2020) do a smaller-scale analysis of code generation but with their limited  
231 language-specific training data models “fail to pass even a single predefined test case” on their 300

test problems, while with our large training set and test set, trained models can pass tens of thousands of test cases. Zelle and Mooney (1996) and Tang and Mooney (2001) precedes Yu et al. (2018) by also facilitating the synthesis of database queries, though more recent program synthesis works such as Wang et al. (2019) use Spider from Yu et al. (2018).

Table 1 compares APPS to Hearthstone (Ling et al., 2016), Django (Oda et al., 2015), and Zaver-shynskyi et al. (2018). ‘Number of Programs’ refers to the number of human-written programs or functions in the dataset, and ‘Number of Exercises’ refers to the number of tasks that the network must solve. These numbers can differ in datasets such as APPS with multiple human-written solutions per exercise.

**Excluded Keywords.** In creating the GitHub pretraining dataset, we exclude the following key-words to prevent overlap with coding challenge questions similar to those in APPS: ‘atcoder’, ‘coderbyte’, ‘leetcode’, ‘codeforces’, ‘codewars’, ‘hackerrank’, ‘topcoder’, ‘codechef’, ‘checkio’, ‘HackerEarth’, ‘Programmr’, ‘Exercism’, ‘Codier’, ‘PyBites’, ‘Tynker’, ‘CodinGame’, ‘CodeCom-bat’, ‘usaco’, ‘IOI’, ‘UVA’, ‘ICFP’, ‘EPIJudge’, ‘SPOJ’, ‘UVaOJ’, ‘judge’, ‘interview’, ‘solution’, ‘coding’, ‘code’, ‘problem’, ‘exercise’, ‘challenge’, ‘algo’, ‘practice’, ‘competitive’, ‘program’.

## D Additional Results

**Top-5 Performance.** Rather than allowing models to generate just one potential solution, we let models generate five and we choose the best performing solution. Full top-5 performance results are in Table 2.

**GPT-3.** We evaluate GPT-3 175B on APPS in a few-shot setting. A separate prompt is used for standard input and call-based questions, and each prompt includes instruction text along with two example questions and solutions from the corresponding question type. The solutions we select for each prompt are the shortest solutions passing all test cases for the corresponding problems. In preliminary experiments, we found that the original GPT-3 175B did not perform well, and the instruct series was necessary for reasonable generations. Inference on the 5,000 problems in the APPS test set is possible for approximately \$500.

We find that GPT-3 only solves 3 problems out of 5,000: two introductory problems and one interview problem. The two introductory problems are simple interpretation tasks, such as implementing a specified algebraic expression. The interview problem requires higher-level thinking and is show in Figure 1. Legitimately solving this problem would suggest nontrivial reasoning. However, it is possible that GPT-3 memorized the solution during pretraining, or that it took a lucky guess based on heuristics in the question.

We also find that GPT-3 tends to handle syntax poorly. In Figure 2, we see a generation with improper formatting of an if-else block, which causes a syntax error. By contrast, GPT-2 0.1B has fewer syntax errors with three orders of magnitude fewer parameters, and GPT-Neo 2.7B has almost no syntax errors. These two models are fine-tuned on GitHub and the APPS training set.

**More Generated Code Examples.** Additional examples of generated code can be found in Figure 3, Figure 4, and Figure 5.

## References

- Miltiadis Allamanis and Charles Sutton. Mining source code repositories at massive scale using language modeling. In *2013 10th Working Conference on Mining Software Repositories (MSR)*, pages 207–216. IEEE, 2013.
- Timnit Gebru, Jamie Morgenstern, Briana Vecchione, Jennifer Wortman Vaughan, Hanna Wallach, Hal Daumeé III, and Kate Crawford. Datasheets for datasets. *arXiv preprint arXiv:1803.09010*, 2018.
- Srinivasan Iyer, Ioannis Konstas, Alvin Cheung, and Luke Zettlemoyer. Mapping language to code in programmatic context. In *Proceedings of the 2018 Conference on Empirical Methods in Natural Language Processing*, Brussels, Belgium, October-November 2018. Association for Computational Linguistics.

### Problem

Mahmoud and Ehab play a game called the even-odd game. Ehab chooses his favorite integer  $n$  and then they take turns, starting from Mahmoud. In each player’s turn, he has to choose an integer  $a$  and subtract it from  $n$  such that:  $1 \leq a \leq n$ . If it’s Mahmoud’s turn,  $a$  has to be even, but if it’s Ehab’s turn,  $a$  has to be odd.

If the current player can’t choose any number satisfying the conditions, he loses. Can you determine the winner if they both play optimally?

—Input—

The only line contains an integer  $n$  ( $1 \leq n \leq 10^9$ ), the number at the beginning of the game.

—Output—

Output “Mahmoud” (without quotes) if Mahmoud wins and “Ehab” (without quotes) otherwise.

### Model Output

```
n = int(input())
if n % 2 == 0:
    print('Mahmoud')
else:
    print('Ehab')
```

Figure 1: The sole interview problem solved by GPT-3. Legitimately solving this problem requires nontrivial reasoning about the proposed game’s branching possibilities.

```
a, b = int(input()), int(input())
if a == b:

print(''.join(map(str, [a, b])))

else:

print(''.join(map(str, [a, b])))
```

Figure 2: Oftentimes, GPT-3 generates outputs with incorrect syntax, such as the above code. Even though the code is reasonable, bad formatting of the if-else block causes a syntax error.

- 281 Sumith Kulal, Panupong Pasupat, Kartik Chandra, Mina Lee, Oded Padon, Alex Aiken, and Percy S  
282 Liang. Spoc: Search-based pseudocode to code. In *Advances in Neural Information Processing*  
283 *Systems*, volume 32, 2019.
- 284 W. Ling, P. Blunsom, Edward Grefenstette, K. Hermann, Tomas Kocisky, Fumin Wang, and A. Senior.  
285 Latent predictor networks for code generation. *ArXiv*, abs/1603.06744, 2016.
- 286 Hui Liu, Mingzhu Shen, Jiaqi Zhu, Nan Niu, Ge Li, and Lu Zhang. Deep learning based program  
287 generation from requirements text: Are we there yet? *IEEE Transactions on Software Engineering*,  
288 2020.
- 289 Shuai Lu, Daya Guo, Shuo Ren, Junjie Huang, Alexey Svyatkovskiy, A. Blanco, C. Clement, Dawn  
290 Drain, Daxin Jiang, Duyu Tang, Ge Li, L. Zhou, Linjun Shou, Long Zhou, Michele Tufano,  
291 Ming Gong, Ming Zhou, N. Duan, N. Sundaresan, Shao Kun Deng, Shengyu Fu, and Shujie Liu.  
292 Codexglue: A machine learning benchmark dataset for code understanding and generation. 2021.
- 293 Yusuke Oda, Hiroyuki Fudaba, Graham Neubig, Hideaki Hata, Sakriani Sakti, Tomoki Toda, and  
294 Satoshi Nakamura. Learning to generate pseudo-code from source code using statistical machine  
295 translation. In *International Conference on Automated Software Engineering (ASE)*, 2015.
- 296 Veselin Raychev, Pavol Bielik, and Martin T. Vechev. Probabilistic model for code with decision  
297 trees. *Proceedings of the 2016 ACM SIGPLAN International Conference on Object-Oriented*  
298 *Programming, Systems, Languages, and Applications*, 2016.
- 299 L. Tang and R. Mooney. Using multiple clause constructors in inductive logic programming for  
300 semantic parsing. In *ECML*, 2001.
- 301 Bailin Wang, Richard Shin, Xiaodong Liu, Oleksandr Polozov, and Matthew Richardson. Rat-  
302 sql: Relation-aware schema encoding and linking for text-to-sql parsers. *arXiv preprint*  
303 *arXiv:1911.04942*, 2019.



### Problem

Given is a directed graph  $G$  with  $N$  vertices and  $M$  edges. The vertices are numbered 1 to  $N$ , and the  $i$ -th edge is directed from Vertex  $A_i$  to Vertex  $B_i$ . It is guaranteed that the graph contains no self-loops or multiple edges. Determine whether there exists an induced subgraph (see Notes) of  $G$  such that the in-degree and out-degree of every vertex are both 1. If the answer is yes, show one such subgraph. Here the null graph is not considered as a subgraph.

### Model Output

```
import sys

sys.setrecursionlimit(10 ** 7)
input = sys.stdin.readline
f_inf = float('inf')
mod = 10 ** 9 + 7

def resolve():
    n, m = map(int, input().split())
    edge = [[] for _ in range(n)]
    for _ in range(m):
        a, b = map(int, input().split())
        edge[a - 1].append(b - 1)
        edge[b - 1].append(a - 1)

    def dfs(u):
        stack = [u]
        seen = [False] * n
        while stack:
            u = stack.pop()
            if seen[u]:
                continue
            seen[u] = True
            for v in edge[u]:
                if seen[v]:
                    continue
                seen[v] = True
                stack.append(v)

    res = None
    for i in range(n):
        if not seen[i]:
            seen[i] = True
            res = dfs(i)
    if not res:
        print(-1)
    else:
        print(res)

if __name__ == '__main__':
    resolve()
```

Figure 3: An example generated by GPT-2 1.5B. The model can sometimes compose function calls.

### Problem

Given is a tree  $G$  with  $N$  vertices. The vertices are numbered 1 through  $N$ , and the  $i$ -th edge connects Vertex  $a_i$  and Vertex  $b_i$ . Consider painting the edges in  $G$  with some number of colors. We want to paint them so that, for each vertex, the colors of the edges incident to that vertex are all different. Among the colorings satisfying the condition above, construct one that uses the minimum number of colors.

### Model Output

```
import sys
from collections import deque, defaultdict, Counter
from itertools import accumulate, product, permutations, combinations
from operator import itemgetter
from bisect import bisect_left, bisect_right
from heapq import heappop, heappush
from math import ceil, floor, sqrt, gcd, inf
from copy import deepcopy
import numpy as np
import scipy as sp

INF = inf
MOD = 1000000007

n = int(input())
ab = [list(map(int, input().split())) for i in range(n - 1)]

graph = [[] for i in range(n + 1)]
for a, b in ab:
    graph[a].append(b)
    graph[b].append(a)

visited = [False] * (n + 1)
color = [0] * (n + 1)
color[0] = 1
stack = [1]
while stack:
    x = stack.pop()
    for y in graph[x]:
        if visited[y]:
            continue
        visited[y] = True
        color[y] = color[x] + 1
        stack.append(y)

ans = min(color)
print(*ans, sep="\n")
```

Figure 4: An additional generated example. Here, the model output has many import statements.

### Problem

There is a special square room with mirrors on each of the four walls. Except for the southwest corner, there are receptors on each of the remaining corners, numbered 0, 1, and 2. The square room has walls of length  $p$ , and a laser ray from the southwest corner first meets the east wall at a distance  $q$  from the 0th receptor. Return the number of the receptor that the ray meets first. (It is guaranteed that the ray will meet a receptor eventually.)

Example 1:

Input:  $p = 2, q = 1$

Output: 2

Explanation: The ray meets receptor 2 the first time it gets reflected back to the left wall.

### Starter Code

```
class Solution:
    def mirrorReflection(self, p: int, q: int) -> int:
```

### Model Output

```
class Solution:
    def mirrorReflection(self, p: int, q: int) -> int:
        self.p = p
        self.q = q
        self.mirrors = [(0, 1), (0, -1), (1, 0), (-1, 0)]
        return self.mirrors[self.p - 1][self.q - 1]
```

Figure 5: An example using the call-based format with some starter code.

- 304 Tao Yu, Rui Zhang, Kai Yang, Michihiro Yasunaga, Dongxu Wang, Zifan Li, James Ma, Irene Li,
- 305 Qingning Yao, Shanelle Roman, et al. Spider: A large-scale human-labeled dataset for complex
- 306 and cross-domain semantic parsing and text-to-sql task. *arXiv preprint arXiv:1809.08887*, 2018.
- 307 Maksym Zavershynskyi, A. Skidanov, and Illia Polosukhin. Naps: Natural program synthesis dataset.
- 308 *2nd Workshop on Neural Abstract Machines and Program Induction*, 2018.
- 309 J. Zelle and R. Mooney. Learning to parse database queries using inductive logic programming. In
- 310 AAAI/IAAI, Vol. 2, 1996.
